# Supplementary material for: A Nuclear Calcium-Sensing Pathway Is Critical for Gene Regulation and Salt Stress Tolerance in Arabidopsis
Source: PubMed Central journal article supplement (PMC3757082; doi:10.1371/journal.pgen.1003755), 2013-08-29
Supplement: pgen.1003755.s012.pdf [file pgen.1003755.s012.pdf]

**Table S1. Genetic analysis of the *rsal-1* mutant (wild type [female] x *rsal-1* [male] cross).**

| Generation     | Total plants tested | Wild type | <i>rsal-1</i> | $\chi^2$ | P value         |
|----------------|---------------------|-----------|---------------|----------|-----------------|
| F <sub>1</sub> | 42                  | 42        | 0             |          |                 |
| F <sub>2</sub> | 478                 | 366       | 112           | 0.63     | 0.30 < P < 0.50 |
