# Supplementary material for: A Nuclear Calcium-Sensing Pathway Is Critical for Gene Regulation and Salt Stress Tolerance in Arabidopsis
Source: PubMed Central journal article supplement (PMC3757082; doi:10.1371/journal.pgen.1003755), 2013-08-29
Supplement: pgen.1003755.s013.pdf [file pgen.1003755.s013.pdf]

**Table S2. Differentially expressed genes in *rsal-1* under control condition as determined by microarray analysis.****Table S2A. Genes with increased expression in *rsal-1* without stress as determined by microarray analysis.**

| AGI ID    | Fold Change | P Value  | Gene Description                                                         | Go Term (Biological Process)           |
|-----------|-------------|----------|--------------------------------------------------------------------------|----------------------------------------|
| AT1G64110 | 2.42        | 0.000017 | P-loop containing nucleoside triphosphate hydrolases superfamily protein | developmental processes                |
| AT2G03150 | 2.37        | 0.000024 | ATP/GTP-binding protein family                                           | developmental processes                |
| AT3G15670 | 2.42        | 0.001547 | Late embryogenesis abundant protein (LEA) family protein                 | developmental processes                |
| AT1G08430 | 2.19        | 0.000142 | aluminum-activated malate transporter 1                                  | other biological processes             |
| AT1G33790 | 3.06        | 0.000025 | jacalin lectin family protein                                            | other biological processes             |
| AT1G73040 | 2.11        | 0.002153 | Mannose-binding lectin superfamily protein                               | other biological processes             |
| AT4G12340 | 3.36        | 0.000001 | copper ion binding                                                       | other biological processes             |
| AT2G47780 | 5.32        | 0.000002 | Rubber elongation factor protein (REF)                                   | other biological processes             |
| AT3G08860 | 2.88        | 0.000005 | PYRIMIDINE 4                                                             | other cellular processes               |
| AT3G49580 | 2.51        | 0.004612 | response to low sulfur 1                                                 | other cellular processes               |
| AT4G25820 | 2.19        | 0.000805 | xyloglucan endotransglucosylase/hydrolase 14                             | other cellular processes               |
| AT5G22460 | 2.14        | 0.000098 | alpha/beta-Hydrolases superfamily protein                                | other cellular processes               |
| AT4G02270 | 2.18        | 0.000381 | root hair specific 13                                                    | other enzyme activity                  |
| AT3G21720 | 3.16        | 0.000001 | isocitrate lyase                                                         | other metabolic processes              |
| AT4G14090 | 2.25        | 0.002155 | UDP-Glycosyltransferase superfamily protein                              | other metabolic processes              |
| AT4G15530 | 2.08        | 0.000085 | pyruvate orthophosphate dikinase                                         | other metabolic processes              |
| AT4G22870 | 2.83        | 0.001225 | 2-oxoglutarate (2OG) and Fe(II)-dependent oxygenase superfamily protein  | other metabolic processes              |
| AT5G03860 | 3.16        | 0.000011 | malate synthase                                                          | other metabolic processes              |
| AT5G17220 | 2.85        | 0.002604 | glutathione S-transferase phi 12                                         | other metabolic processes              |
| AT5G56080 | 2.14        | 0.000825 | nicotianamine synthase 2                                                 | other metabolic processes              |
| AT4G17470 | 2.33        | 0.000098 | alpha/beta-Hydrolases superfamily protein                                | protein metabolism                     |
| AT5G54060 | 2.28        | 0.001335 | UDP-glucose:flavonoid 3-o-glucosyltransferase                            | protein metabolism                     |
| AT3G02480 | 2.47        | 0.000049 | Late embryogenesis abundant protein (LEA) family protein                 | response to abiotic or biotic stimulus |
| AT4G36880 | 2.69        | 0.000532 | cysteine proteinase1                                                     | response to abiotic or biotic stimulus |
| AT5G06760 | 2.01        | 0.002845 | Late Embryogenesis Abundant 4-5                                          | response to abiotic or biotic stimulus |
| AT5G10140 | 4.39        | 0.000000 | K-box region and MADS-box transcription factor family protein            | response to abiotic or biotic stimulus |
| AT5G59310 | 6.33        | 0.000001 | lipid transfer protein 4                                                 | response to abiotic or biotic stimulus |
| AT5G59320 | 4.13        | 0.000001 | lipid transfer protein 3                                                 | response to abiotic or biotic stimulus |
| AT1G52040 | 3.74        | 0.002647 | myrosinase-binding protein 1                                             | response to stress                     |
| AT1G73120 | 2.46        | 0.000078 | unknown protein                                                          | response to stress                     |

|           |      |          |                                                         |                              |
|-----------|------|----------|---------------------------------------------------------|------------------------------|
| AT1G80130 | 2.05 | 0.000046 | Tetratricopeptide repeat (TPR)-like superfamily protein | response to stress           |
| AT2G15010 | 3.29 | 0.001390 | Plant thionin                                           | response to stress           |
| AT3G49960 | 2.24 | 0.002709 | Peroxidase superfamily protein                          | response to stress           |
| AT5G67400 | 2.33 | 0.002752 | root hair specific 19                                   | response to stress           |
| AT2G37870 | 3.24 | 0.000000 | seed storage 2S albumin superfamily protein             | transport                    |
| AT4G25010 | 2.15 | 0.000238 | Nodulin MtN3 family protein                             | transport                    |
| AT4G25220 | 2.35 | 0.000135 | root hair specific 15                                   | transport                    |
| AT4G27140 | 3.69 | 0.000004 | seed storage albumin 1                                  | transport                    |
| AT5G01870 | 3.13 | 0.000004 | seed storage 2S albumin superfamily protein             | transport                    |
| AT2G18680 | 2.47 | 0.000173 | unknown protein                                         | unknown biological processes |
| AT5G20790 | 2.06 | 0.000056 | unknown protein                                         | unknown biological processes |

**Table S2B. Genes with reduced expression in *rsal-1* without stress as determined by microarray analysis.**

| AGI ID    | Fold Change | P Value  | Gene Description                                         | Go Term (Biological Process)          |
|-----------|-------------|----------|----------------------------------------------------------|---------------------------------------|
| AT1G59840 | 4.77        | 0.000001 | cofactor assembly of complex C                           | cell organization and biogenesis      |
| AT4G12550 | 4.56        | 0.000016 | Auxin-Induced in Root cultures 1                         | developmental processes               |
| AT1G45474 | 2.16        | 0.000008 | photosystem I light harvesting complex gene 5            | electron transport or energy pathways |
| AT2G33790 | 4.33        | 0.000000 | arabinogalactan protein 30                               | other biological processes            |
| AT5G23830 | 2.00        | 0.000401 | MD-2-related lipid recognition domain-containing protein | other cellular processes              |
| AT5G23840 | 2.66        | 0.000349 | MD-2-related lipid recognition domain-containing protein | other cellular processes              |
| AT5G53110 | 2.03        | 0.000532 | RING/U-box superfamily protein                           | other cellular processes              |
| AT1G21100 | 5.28        | 0.000004 | O-methyltransferase family protein                       | other metabolic processes             |
| AT1G50560 | 2.06        | 0.000263 | cytochrome P450 family protein (CYP705A25)               | other metabolic processes             |
| AT1G64590 | 2.32        | 0.000976 | NAD(P)-binding Rossmann-fold superfamily protein         | other metabolic processes             |
| AT2G44380 | 3.14        | 0.000001 | Cysteine/Histidine-rich C1 domain family protein         | other metabolic processes             |
| AT2G46750 | 2.88        | 0.000068 | D-arabinono-1,4-lactone oxidase family protein           | other metabolic processes             |
| AT3G13760 | 2.30        | 0.002161 | Cysteine/Histidine-rich C1 domain family protein         | other metabolic processes             |
| AT3G26210 | 2.46        | 0.000187 | cytochrome P450, family 71, subfamily B, polypeptide 23  | other metabolic processes             |
| AT4G39120 | 3.61        | 0.000008 | myo-inositol monophosphatase like 2                      | other metabolic processes             |
| AT5G17530 | 2.73        | 0.000001 | phosphoglucosamine mutase family protein                 | other metabolic processes             |
| AT5G36140 | 2.39        | 0.000381 | cytochrome P450, family 716, subfamily A, polypeptide 2  | other metabolic processes             |
| AT5G42600 | 3.44        | 0.000177 | marneral synthase                                        | other metabolic processes             |

|           |        |            |                                                                         |                                        |
|-----------|--------|------------|-------------------------------------------------------------------------|----------------------------------------|
| AT5G43520 | 2.22   | 0.000143   | Cysteine/Histidine-rich C1 domain family protein                        | other metabolic processes              |
| AT1G19900 | 2.68   | 0.000010   | glyoxal oxidase-related protein                                         | other metabolic processes              |
| AT1G24610 | 2.27   | 0.000001   | Rubisco methyltransferase family protein                                | other metabolic processes              |
| AT1G52060 | 2.08   | 0.000143   | Mannose-binding lectin superfamily protein                              | other metabolic processes              |
| AT2G36690 | 2.0315 | 0.00139035 | 2-oxoglutarate (2OG) and Fe(II)-dependent oxygenase superfamily protein | other metabolic processes              |
| AT5G62330 | 2.48   | 0.000970   | Plant invertase/pectin methylesterase inhibitor superfamily protein     | other metabolic processes              |
| AT1G51860 | 2.03   | 0.000099   | Leucine-rich repeat protein kinase family protein                       | protein metabolism                     |
| AT3G05350 | 2.22   | 0.000004   | Metallopeptidase M24 family protein                                     | protein metabolism                     |
| AT3G51330 | 2.03   | 0.001389   | Eukaryotic aspartyl protease family protein                             | protein metabolism                     |
| AT4G05200 | 2.44   | 0.000087   | cysteine-rich RLK (RECEPTOR-like protein kinase) 25                     | protein metabolism                     |
| AT1G08830 | 2.15   | 0.004902   | copper/zinc superoxide dismutase 1                                      | response to abiotic or biotic stimulus |
| AT1G70880 | 2.03   | 0.000262   | Polyketide cyclase/dehydrase and lipid transport superfamily protein    | response to abiotic or biotic stimulus |
| AT2G01520 | 2.96   | 0.001662   | MLP-like protein 328                                                    | response to abiotic or biotic stimulus |
| AT2G01530 | 2.57   | 0.000010   | MLP-like protein 329                                                    | response to abiotic or biotic stimulus |
| AT2G28190 | 2.51   | 0.000397   | copper/zinc superoxide dismutase 2                                      | response to abiotic or biotic stimulus |
| AT3G45410 | 2.16   | 0.000537   | Concanavalin A-like lectin protein kinase family protein                | response to abiotic or biotic stimulus |
| AT4G12480 | 2.06   | 0.000433   | seed storage 2S albumin superfamily protein                             | response to abiotic or biotic stimulus |
| AT4G14060 | 2.75   | 0.000171   | Polyketide cyclase/dehydrase and lipid transport superfamily protein    | response to abiotic or biotic stimulus |
| AT5G47450 | 2.59   | 0.000041   | tonoplast intrinsic protein 2;3                                         | response to abiotic or biotic stimulus |
| AT5G64120 | 2.89   | 0.000011   | Peroxidase superfamily protein                                          | response to abiotic or biotic stimulus |
| AT1G52200 | 2.81   | 0.000005   | PLAC8 family protein                                                    | response to stress                     |
| AT1G66100 | 3.66   | 0.000062   | Plant thionin                                                           | response to stress                     |
| AT2G39040 | 2.03   | 0.000020   | Peroxidase superfamily protein                                          | response to stress                     |
| AT4G37010 | 2.06   | 0.003164   | centrin 2                                                               | response to stress                     |
| AT5G64100 | 2.12   | 0.000430   | Peroxidase superfamily protein                                          | response to stress                     |
| AT1G10480 | 1.5936 | 0.001672   | zinc finger protein 5                                                   | signal transduction                    |
| AT1G51830 | 2.07   | 0.000201   | Leucine-rich repeat protein kinase family protein                       | signal transduction                    |
| AT1G79950 | 2.73   | 0.000130   | RAD3-like DNA-binding helicase protein                                  | transcription,DNA-dependent            |
| AT5G22890 | 2.17   | 0.000245   | C2H2 and C2HC zinc fingers superfamily protein                          | transcription,DNA-dependent            |
| AT1G32450 | 2.47   | 0.000004   | nitrate transporter 1.5                                                 | transport                              |
| AT3G45710 | 2.35   | 0.000098   | Major facilitator superfamily protein                                   | transport                              |
| AT2G37750 | 2.21   | 0.000025   | unknown protein                                                         | unknown biological processes           |
| AT2G44010 | 2.34   | 0.000031   | unknown protein                                                         | unknown biological processes           |
| AT4G03150 | 2.79   | 0.000170   | unknown protein                                                         | unknown biological processes           |
| AT4G37090 | 2.04   | 0.001050   | unknown protein                                                         | unknown biological processes           |
| AT5G26270 | 2.87   | 0.000020   | unknown protein                                                         | unknown biological processes           |
