# Supplementary material for: A Nuclear Calcium-Sensing Pathway Is Critical for Gene Regulation and Salt Stress Tolerance in Arabidopsis
Source: PubMed Central journal article supplement (PMC3757082; doi:10.1371/journal.pgen.1003755), 2013-08-29
Supplement: pgen.1003755.s014.pdf [file pgen.1003755.s014.pdf]

**Table S3. Differentially expressed genes in *rsa1-1* under salt stress as determined by microarray analysis.****Table S3A. Genes with increased expression in *rsa1-1* under salt stress as determined by microarray analysis.**

| AGI ID    | Fold Change | P Value   | Gene Description                                         | Go Term (Biological Process) |
|-----------|-------------|-----------|----------------------------------------------------------|------------------------------|
| AT1G15330 | 4.14        | 0.000002  | Cystathionine beta-synthase (CBS) protein                | developmental processes      |
| AT2G36640 | 2.29        | 0.008510  | embryonic cell protein 63                                | developmental processes      |
| AT2G42560 | 2.04        | 0.003709  | LEA domain-containing protein                            | developmental processes      |
| AT3G15670 | 4.20        | 0.000018  | Late embryogenesis abundant protein (LEA) family protein | developmental processes      |
| AT3G17520 | 2.09        | 0.000251  | Late embryogenesis abundant protein (LEA) family protein | developmental processes      |
| AT3G22490 | 2.15        | 0.000591  | Seed maturation protein                                  | developmental processes      |
| AT3G51810 | 3.42        | 0.000012  | Stress induced protein                                   | developmental processes      |
| AT4G21020 | 2.43        | 0.000719  | Late embryogenesis abundant protein (LEA) family protein | developmental processes      |
| AT4G28520 | 2.18        | 0.000998  | cruciferin 3                                             | developmental processes      |
| AT4G36600 | 2.84        | 0.002876  | Late embryogenesis abundant (LEA) protein                | developmental processes      |
| AT5G44120 | 2.07        | 0.0004387 | RmlC-like cupins superfamily protein                     | developmental processes      |
| AT5G44310 | 2.63        | 0.0013813 | Late embryogenesis abundant protein (LEA) family protein | developmental processes      |
| AT1G08430 | 2.44        | 0.000033  | aluminum-activated malate transporter 1                  | other biological processes   |
| AT1G22690 | 2.12        | 0.000031  | Gibberellin-regulated family protein                     | other biological processes   |
| AT1G48660 | 2.58        | 0.000017  | Auxin-responsive GH3 family protein                      | other biological processes   |
| AT3G01570 | 2.68        | 0.000005  | Oleosin family protein                                   | other biological processes   |
| AT2G28490 | 2.05        | 0.000800  | RmlC-like cupins superfamily protein                     | other biological processes   |
| AT2G42750 | 2.02        | 0.000537  | DNAJ heat shock N-terminal domain-containing protein     | other cellular processes     |
| AT3G18290 | 2.26        | 0.000017  | zinc finger protein-related                              | other cellular processes     |
| AT1G04560 | 2.03        | 0.002847  | AWPM-19-like family protein                              | other cellular processes     |
| AT1G33790 | 2.95        | 0.000024  | jacalin lectin family protein                            | other cellular processes     |
| AT1G47400 | 5.10        | 0.000101  | unknown protein                                          | other cellular processes     |
| AT2G47780 | 5.11        | 0.000002  | Rubber elongation factor protein (REF)                   | other cellular processes     |
| AT3G22640 | 3.06        | 0.007130  | cupin family protein                                     | other cellular processes     |
| AT4G36700 | 2.25        | 0.000202  | RmlC-like cupins superfamily protein                     | other cellular processes     |
| AT4G12340 | 3.72        | 0.000000  | copper ion binding                                       | other cellular processes     |
| AT1G23020 | 2.89        | 0.000007  | ferric reduction oxidase 3                               | other metabolic processes    |
| AT1G48470 | 2.19        | 0.000870  | glutamine synthetase 1;5                                 | other metabolic processes    |
| AT1G56430 | 2.03        | 0.007985  | nicotianamine synthase 4                                 | other metabolic processes    |
| AT2G29330 | 2.68        | 0.000413  | tropinone reductase                                      | other metabolic processes    |
| AT3G21720 | 3.16        | 0.000001  | isocitrate lyase                                         | other metabolic processes    |
| AT3G48700 | 2.20        | 0.000168  | carboxyesterase 13                                       | other metabolic processes    |

|           |       |           |                                                                |                                        |
|-----------|-------|-----------|----------------------------------------------------------------|----------------------------------------|
| AT5G03860 | 4.97  | 0.000000  | malate synthase                                                | other metabolic processes              |
| AT5G23020 | 2.04  | 0.0002730 | 2-isopropylmalate synthase 2                                   | other metabolic processes              |
| AT5G01300 | 2.02  | 0.000398  | PEBP (phosphatidylethanolamine-binding protein) family protein | other metabolic processes              |
| AT3G54940 | 2.05  | 0.001171  | Papain family cysteine protease                                | protein metabolism                     |
| AT5G53450 | 2.94  | 0.0000218 | OBP3-responsive gene 1                                         | protein metabolism                     |
| AT1G05680 | 2.26  | 0.000054  | Uridine diphosphate glycosyltransferase 74E2                   | response to abiotic or biotic stimulus |
| AT1G32560 | 2.17  | 0.002025  | Late embryogenesis abundant protein 4-1                        | response to abiotic or biotic stimulus |
| AT2G21490 | 3.73  | 0.000096  | dehydrin LEA                                                   | response to abiotic or biotic stimulus |
| AT3G14880 | 2.08  | 0.000041  | transcription factor-related                                   | response to abiotic or biotic stimulus |
| AT3G50980 | 2.19  | 0.000054  | dehydrin xero 1                                                | response to abiotic or biotic stimulus |
| AT4G19690 | 6.40  | 0.000004  | iron-regulated transporter 1                                   | response to abiotic or biotic stimulus |
| AT5G06760 | 2.10  | 0.001487  | Late Embryogenesis Abundant 4-5                                | response to abiotic or biotic stimulus |
| AT5G10140 | 4.84  | 0.0000000 | K-box region and MADS-box transcription factor family protein  | response to abiotic or biotic stimulus |
| AT5G13740 | 2.05  | 0.0000623 | zinc induced facilitator 1                                     | response to abiotic or biotic stimulus |
| AT1G71400 | 2.37  | 0.000001  | receptor like protein 12                                       | response to stress                     |
| AT1G73120 | 2.11  | 0.000268  | unknown protein                                                | response to stress                     |
| AT1G75830 | 2.14  | 0.008293  | low-molecular-weight cysteine-rich 67                          | response to stress                     |
| AT2G15010 | 4.78  | 0.000101  | Plant thionin                                                  | response to stress                     |
| AT2G23110 | 2.44  | 0.000304  | Late embryogenesis abundant protein, group 6                   | response to stress                     |
| AT3G18290 | 2.26  | 0.000017  | zinc finger protein-related                                    | response to stress                     |
| AT1G03790 | 2.01  | 0.000582  | Zinc finger C-x8-C-x5-C-x3-H type family protein               | transcription,DNA-dependent            |
| AT3G56980 | 3.71  | 0.000019  | basic helix-loop-helix (bHLH) DNA-binding superfamily protein  | transcription,DNA-dependent            |
| AT5G04150 | 5.57  | 0.000009  | basic helix-loop-helix (bHLH) DNA-binding superfamily protein  | transcription,DNA-dependent            |
| AT4G18650 | 2.30  | 0.000496  | transcription factor-related                                   | transcription,DNA-dependent            |
| AT4G16160 | 2.34  | 0.000041  | Mitochondrial import inner membrane translocase subunit        | transport                              |
| AT4G27140 | 12.48 | 0.000000  | seed storage albumin 1                                         | transport                              |
| AT5G01870 | 2.34  | 0.000041  | lipid-transfer protein                                         | transport                              |
| AT1G02700 | 2.24  | 0.000017  | unknown protein                                                | unknown biological processes           |
| AT1G65090 | 3.28  | 0.000012  | unknown protein                                                | unknown biological processes           |
| AT1G68250 | 2.75  | 0.000118  | unknown protein                                                | unknown biological processes           |
| AT2G19320 | 2.19  | 0.000552  | unknown protein                                                | unknown biological processes           |
| AT2G21820 | 2.19  | 0.002025  | unknown protein                                                | unknown biological processes           |
| AT3G19920 | 2.20  | 0.000512  | unknown protein                                                | unknown biological processes           |
| AT5G05250 | 2.45  | 0.000357  | unknown protein                                                | unknown biological processes           |
| AT5G07330 | 2.53  | 0.0001317 | unknown protein                                                | unknown biological processes           |
| AT5G66780 | 4.49  | 0.0000069 | unknown protein                                                | unknown biological processes           |
| AT5G67370 | 2.21  | 0.0000664 | unknown protein                                                | unknown biological processes           |

**Table S3B. Genes with reduced expression in *rsa1-1* under salt stress as determined by microarray analysis.**

| AGI ID    | Fold Change | P Value  | Gene Description                                                        | Go Term (Biological Process)          |
|-----------|-------------|----------|-------------------------------------------------------------------------|---------------------------------------|
| AT1G59840 | 5.34        | 0.000000 | cofactor assembly of complex C                                          | cell organization and biogenesis      |
| AT2G45220 | 2.91        | 0.000007 | Plant invertase/pectin methylesterase inhibitor superfamily             | cell organization and biogenesis      |
| AT4G01630 | 2.07        | 0.000069 | expansin A17                                                            | cell organization and biogenesis      |
| AT1G11190 | 2.58        | 0.000054 | bifunctional nuclease i                                                 | DNA or RNA metabolism                 |
| AT1G45474 | 3.39        | 0.000000 | photosystem I light harvesting complex gene 5                           | electron transport or energy pathways |
| AT2G05510 | 2.10        | 0.000130 | Glycine-rich protein                                                    | other biological processes            |
| AT2G16005 | 2.55        | 0.004500 | MD-2-related lipid recognition domain-containing protein                | other biological processes            |
| AT2G33790 | 3.95        | 0.000000 | arabinogalactan protein 30                                              | other biological processes            |
| AT5G23830 | 2.74        | 0.000012 | MD-2-related lipid recognition domain-containing protein                | other biological processes            |
| AT1G21100 | 2.48        | 0.000632 | O-methyltransferase family protein                                      | other cellular processes              |
| AT3G09220 | 2.16        | 0.000035 | laccase 7                                                               | other cellular processes              |
| AT1G05660 | 2.87        | 0.000066 | Pectin lyase-like superfamily protein                                   | other metabolic processes             |
| AT1G14120 | 2.37        | 0.002630 | 2-oxoglutarate (2OG) and Fe(II)-dependent oxygenase superfamily protein | other metabolic processes             |
| AT1G30700 | 2.49        | 0.000049 | FAD-binding Berberine family protein                                    | other metabolic processes             |
| AT1G50560 | 2.16        | 0.000109 | cytochrome P450, family 705, subfamily A, polypeptide 25                | other metabolic processes             |
| AT2G36690 | 2.08        | 0.000189 | 2-oxoglutarate (2OG) and Fe(II)-dependent oxygenase superfamily protein | other metabolic processes             |
| AT3G13784 | 2.09        | 0.001985 | cell wall invertase 5                                                   | other metabolic processes             |
| AT3G25830 | 2.71        | 0.001655 | terpene synthase-like sequence-1,8-cineole                              | other metabolic processes             |
| AT3G43670 | 2.60        | 0.000133 | Copper amine oxidase family protein                                     | other metabolic processes             |
| AT3G46700 | 2.13        | 0.000591 | UDP-Glycosyltransferase superfamily protein                             | other metabolic processes             |
| AT4G13310 | 2.82        | 0.000005 | cytochrome P450, family 71, subfamily A, polypeptide 20                 | other metabolic processes             |
| AT4G39120 | 5.96        | 0.000000 | myo-inositol monophosphatase like 2                                     | other metabolic processes             |
| AT5G04120 | 3.04        | 0.000206 | Phosphoglycerate mutase family protein                                  | other metabolic processes             |
| AT5G17530 | 3.68        | 0.000000 | phosphoglucosamine mutase family protein                                | other metabolic processes             |
| AT5G24140 | 2.03        | 0.001785 | squalene monooxygenase 2                                                | other metabolic processes             |
| AT5G28510 | 2.98        | 0.000000 | beta glucosidase 24                                                     | other metabolic processes             |
| AT5G42580 | 2.29        | 0.002919 | cytochrome P450, family 705, subfamily A, polypeptide 12                | other metabolic processes             |
| AT5G42600 | 2.69        | 0.000857 | marneral synthase                                                       | other metabolic processes             |
| AT1G24610 | 2.63        | 0.000000 | Rubisco methyltransferase family protein                                | other metabolic processes             |
| AT1G35250 | 2.23        | 0.000041 | Thioesterase superfamily protein                                        | other metabolic processes             |
| AT5G28520 | 3.87        | 0.000018 | Mannose-binding lectin superfamily protein                              | other metabolic processes             |
| AT3G05350 | 2.52        | 0.000001 | Metallopeptidase M24 family protein                                     | protein metabolism                    |
| AT3G46280 | 2.35        | 0.000048 | protein kinase-related                                                  | protein metabolism                    |

|           |      |          |                                                                      |                                        |
|-----------|------|----------|----------------------------------------------------------------------|----------------------------------------|
| AT4G04460 | 2.16 | 0.000052 | Saposin-like aspartyl protease family protein                        | protein metabolism                     |
| AT5G04200 | 2.00 | 0.000005 | metacaspase 9                                                        | protein metabolism                     |
| AT1G14960 | 2.05 | 0.016870 | Polyketide cyclase/dehydrase and lipid transport superfamily protein | response to abiotic or biotic stimulus |
| AT1G70850 | 2.02 | 0.000142 | MLP-like protein 34                                                  | response to abiotic or biotic stimulus |
| AT1G73330 | 2.10 | 0.000241 | drought-repressed 4                                                  | response to abiotic or biotic stimulus |
| AT2G01520 | 2.92 | 0.001365 | MLP-like protein 328                                                 | response to abiotic or biotic stimulus |
| AT3G01290 | 2.01 | 0.000504 | SPFH/Band 7/PHB domain-containing membrane-associated protein family | response to abiotic or biotic stimulus |
| AT3G11340 | 2.28 | 0.000010 | UDP-Glycosyltransferase superfamily protein                          | response to abiotic or biotic stimulus |
| AT3G15570 | 2.79 | 0.000315 | Phototropic-responsive NPH3 family protein                           | response to abiotic or biotic stimulus |
| AT3G26460 | 3.23 | 0.000071 | Polyketide cyclase/dehydrase and lipid transport superfamily protein | response to abiotic or biotic stimulus |
| AT4G10250 | 2.06 | 0.000385 | HSP20-like chaperones superfamily protein                            | response to abiotic or biotic stimulus |
| AT4G12470 | 2.01 | 0.009553 | azelaic acid induced 1                                               | response to abiotic or biotic stimulus |
| AT4G12480 | 2.20 | 0.000135 | lipid-transfer protein                                               | response to abiotic or biotic stimulus |
| AT4G14060 | 2.03 | 0.002251 | Polyketide cyclase/dehydrase and lipid transport superfamily protein | response to abiotic or biotic stimulus |
| AT5G38030 | 2.31 | 0.000023 | MATE efflux family protein                                           | response to abiotic or biotic stimulus |
| AT5G47450 | 2.97 | 0.000009 | tonoplast intrinsic protein 2;3                                      | response to abiotic or biotic stimulus |
| AT5G59720 | 4.03 | 0.000001 | heat shock protein 18.2                                              | response to abiotic or biotic stimulus |
| AT1G52200 | 2.95 | 0.000003 | PLAC8 family protein                                                 | response to stress                     |
| AT1G66100 | 3.11 | 0.000128 | Plant thionin                                                        | response to stress                     |
| AT1G78000 | 2.00 | 0.000012 | sulfate transporter 1;2                                              | response to stress                     |
| AT2G40300 | 2.05 | 0.000034 | ferritin 4                                                           | response to stress                     |
| AT5G14130 | 2.16 | 0.000017 | Peroxidase superfamily protein                                       | response to stress                     |
| AT5G44910 | 2.18 | 0.000681 | Toll-Interleukin-Resistance (TIR) domain family protein              | response to stress                     |
| AT2G39040 | 1.92 | 0.000027 | Peroxidase superfamily protein                                       | response to stress                     |
| AT1G10480 | 2.18 | 0.000017 | zinc finger protein 5                                                | signal transduction                    |
| AT2G34180 | 2.19 | 0.000229 | CBL-interacting protein kinase 13                                    | signal transduction                    |
| AT1G79950 | 2.68 | 0.000104 | RAD3-like DNA-binding helicase protein                               | transcription,DNA-dependent            |
| AT2G18370 | 2.13 | 0.000012 | lipid-transfer protein                                               | transport                              |
| AT2G32270 | 2.27 | 0.000023 | zinc transporter 3 precursor                                         | transport                              |
| AT2G39380 | 2.36 | 0.000007 | exocyst subunit exo70 family protein H2                              | transport                              |
| AT3G22570 | 2.01 | 0.000026 | lipid-transfer protein                                               | transport                              |
| AT3G24300 | 2.41 | 0.000026 | ammonium transporter 1;3                                             | transport                              |
| AT3G45710 | 2.16 | 0.000168 | Major facilitator superfamily protein                                | transport                              |
| AT3G58550 | 2.14 | 0.000067 | lipid-transfer protein                                               | transport                              |
| AT4G12510 | 2.08 | 0.000049 | lipid-transfer protein                                               | transport                              |
| AT4G12550 | 5.77 | 0.000004 | Auxin-Induced in Root cultures 1                                     | transport                              |
| AT5G46900 | 2.21 | 0.000140 | lipid-transfer protein                                               | transport                              |
| AT5G60660 | 2.31 | 0.000020 | plasma membrane intrinsic protein 2;4                                | transport                              |
| AT1G55240 | 2.40 | 0.000049 | unknown protein                                                      | unknown biological processes           |

|           |      |          |                 |                              |
|-----------|------|----------|-----------------|------------------------------|
| AT2G37750 | 2.49 | 0.000005 | unknown protein | unknown biological processes |
| AT4G03150 | 3.12 | 0.000048 | unknown protein | unknown biological processes |
| AT4G37090 | 3.03 | 0.000018 | unknown protein | unknown biological processes |
| AT5G26270 | 2.52 | 0.000047 | unknown protein | unknown biological processes |
