# Supplementary material for: A Nuclear Calcium-Sensing Pathway Is Critical for Gene Regulation and Salt Stress Tolerance in Arabidopsis
Source: PubMed Central journal article supplement (PMC3757082; doi:10.1371/journal.pgen.1003755), 2013-08-29
Supplement: pgen.1003755.s015.pdf [file pgen.1003755.s015.pdf]

**Table S4. Genes that are differentially expressed in *rsal-1* under both control and salt stress conditions as determined by microarray analysis.****Table S4A. Genes with increased expression in *rsal-1* under both control and salt stress conditions as determined by microarray analysis.**

| AGI ID    | Fold Change (Control) | P Value (Control) | Fold Change (Salt Stress) | P Value (Salt Stress) | Gene Description                                              | Go Term (Biological Process)           |
|-----------|-----------------------|-------------------|---------------------------|-----------------------|---------------------------------------------------------------|----------------------------------------|
| AT3G15670 | 2.42                  | 0.0015472         | 4.20                      | 0.0000183             | Late embryogenesis abundant protein (LEA) family protein      | developmental processes                |
| AT1G08430 | 2.19                  | 0.0001419         | 2.44                      | 0.0000333             | aluminum-activated malate transporter 1                       | other biological processes             |
| AT1G33790 | 3.06                  | 0.0000249         | 2.95                      | 0.0000245             | jacalin lectin family protein                                 | other cellular processes               |
| AT2G47780 | 5.32                  | 0.0000023         | 5.11                      | 0.0000025             | Rubber elongation factor protein (REF)                        | other cellular processes               |
| AT4G12340 | 3.36                  | 0.0000007         | 3.72                      | 0.0000002             | copper ion binding                                            | other cellular processes               |
| AT3G21720 | 3.16                  | 0.0000007         | 3.16                      | 0.0000006             | isocitrate lyase                                              | other metabolic processes              |
| AT5G03860 | 3.16                  | 0.0000107         | 4.97                      | 0.0000003             | malate synthase                                               | other metabolic processes              |
| AT5G06760 | 2.01                  | 0.0028449         | 2.10                      | 0.0014866             | Late Embryogenesis Abundant 4-5                               | response to abiotic or biotic stimulus |
| AT5G10140 | 4.39                  | 0.0000000         | 4.84                      | 0.0000000             | K-box region and MADS-box transcription factor family protein | response to abiotic or biotic stimulus |
| AT1G73120 | 2.46                  | 0.0000777         | 2.11                      | 0.0002681             | unknown protein                                               | response to stress                     |
| AT2G15010 | 3.29                  | 0.0013903         | 4.78                      | 0.0001008             | Plant thionin                                                 | response to stress                     |
| AT4G27140 | 3.69                  | 0.0000037         | 12.48                     | 0.0000000             | seed storage albumin 1                                        | transport                              |
| AT5G01870 | 3.13                  | 0.0000037         | 2.34                      | 0.0000413             | lipid-transfer protein                                        | transport                              |

**Table S4B. Genes with reduced expression in *rsal-1* under both control and salt stress conditions as determined by microarray analysis.**

| AGI ID    | Fold Change (Control) | P Value (Control) | Fold Change (Salt Stress) | P Value (Salt Stress) | Gene Description                                                        | Go Term (Biological Process)          |
|-----------|-----------------------|-------------------|---------------------------|-----------------------|-------------------------------------------------------------------------|---------------------------------------|
| AT1G59840 | 4.765                 | 0.0000007         | 5.339                     | 0.0000002             | cofactor assembly of complex C                                          | cell organization and biogenesis      |
| AT1G45474 | 2.162                 | 0.0000080         | 3.386                     | 0.0000001             | photosystem I light harvesting complex gene 5                           | electron transport or energy pathways |
| AT2G33790 | 4.333                 | 0.0000001         | 3.947                     | 0.0000001             | arabinogalactan protein 30                                              | other biological processes            |
| AT5G23830 | 2.002                 | 0.0004012         | 2.744                     | 0.0000117             | MD-2-related lipid recognition domain-containing protein                | other biological processes            |
| AT1G21100 | 5.277                 | 0.0000037         | 2.482                     | 0.0006319             | O-methyltransferase family protein                                      | other cellular processes              |
| AT1G50560 | 2.062                 | 0.0002629         | 2.158                     | 0.0001091             | cytochrome P450, family 705, subfamily A, polypeptide 25                | other metabolic processes             |
| AT4G39120 | 3.609                 | 0.0000082         | 5.959                     | 0.0000002             | myo-inositol monophosphatase like 2                                     | other metabolic processes             |
| AT5G17530 | 2.725                 | 0.0000009         | 3.681                     | 0.0000001             | phosphoglucosamine mutase family protein                                | other metabolic processes             |
| AT5G42600 | 3.443                 | 0.0001774         | 2.686                     | 0.0008573             | marneral synthase                                                       | other metabolic processes             |
| AT1G24610 | 2.274                 | 0.0000009         | 2.63                      | 0.0000002             | Rubisco methyltransferase family protein                                | other metabolic processes             |
| AT2G36690 | 2.032                 | 0.0013903         | 2.079                     | 0.0001887             | 2-oxoglutarate (2OG) and Fe(II)-dependent oxygenase superfamily protein | other metabolic processes             |
| AT3G05350 | 2.218                 | 0.0000037         | 2.522                     | 0.0000006             | Metallopeptidase M24 family protein                                     | protein metabolism                    |

|           |       |           |       |           |                                                                      |                                        |
|-----------|-------|-----------|-------|-----------|----------------------------------------------------------------------|----------------------------------------|
| AT2G01520 | 2.958 | 0.0016625 | 2.923 | 0.0013653 | MLP-like protein 328                                                 | response to abiotic or biotic stimulus |
| AT4G12480 | 2.055 | 0.0004326 | 2.201 | 0.0001352 | lipid-transfer protein                                               | response to abiotic or biotic stimulus |
| AT4G14060 | 2.746 | 0.0001713 | 2.035 | 0.0022514 | Polyketide cyclase/dehydrase and lipid transport superfamily protein | response to abiotic or biotic stimulus |
| AT5G47450 | 2.585 | 0.0000412 | 2.972 | 0.0000089 | tonoplast intrinsic protein 2;3                                      | response to abiotic or biotic stimulus |
| AT1G52200 | 2.81  | 0.0000054 | 2.954 | 0.0000032 | PLAC8 family protein                                                 | response to stress                     |
| AT1G66100 | 3.657 | 0.0000615 | 3.112 | 0.0001280 | Plant thionin                                                        | response to stress                     |
| AT2G39040 | 2.032 | 0.0000201 | 1.924 | 0.0000270 | Peroxidase superfamily protein                                       | response to stress                     |
| AT1G10480 | 1.594 | 0.0016722 | 2.181 | 0.0000165 | zinc finger protein 5                                                | signal transduction                    |
| AT1G79950 | 2.734 | 0.0001302 | 2.676 | 0.0001039 | RAD3-like DNA-binding helicase protein                               | transcription,DNA-dependent            |
| AT4G12550 | 4.556 | 0.0000162 | 5.766 | 0.0000036 | Auxin-Induced in Root cultures 1                                     | transport                              |
| AT3G45710 | 2.352 | 0.0000984 | 2.156 | 0.0001684 | Major facilitator superfamily protein                                | transport                              |
| AT2G37750 | 2.206 | 0.0000245 | 2.49  | 0.0000054 | unknown protein                                                      | unknown biological processes           |
| AT4G03150 | 2.792 | 0.0001695 | 3.121 | 0.0000477 | unknown protein                                                      | unknown biological processes           |
| AT4G37090 | 2.043 | 0.0010499 | 3.031 | 0.0000183 | unknown protein                                                      | unknown biological processes           |
| AT5G26270 | 2.868 | 0.0000201 | 2.517 | 0.0000474 | unknown protein                                                      | unknown biological processes           |
