# Supplementary material for: A Nuclear Calcium-Sensing Pathway Is Critical for Gene Regulation and Salt Stress Tolerance in Arabidopsis
Source: PubMed Central journal article supplement (PMC3757082; doi:10.1371/journal.pgen.1003755), 2013-08-29
Supplement: pgen.1003755.s016.pdf [file pgen.1003755.s016.pdf]

**Table S5. Putative binding sites of bHLH transcription factors (TFs) in promoters of genes differentially expressed in *rsa1-1* with or without salt stress as revealed by microarray analysis.**

**Table S5A. Putative bHLH TFs binding sites in promoters of genes with increased expression in *rsa1-1* without etress.**

| Motif  | Aboundance | Number of genes containing this motif | Total number of genes searched |
|--------|------------|---------------------------------------|--------------------------------|
| CAAATG | 92         | 35                                    | 41                             |
| CAACTG | 37         | 23                                    | 41                             |
| CAAGTG | 58         | 30                                    | 41                             |
| CAATTG | 66         | 23                                    | 41                             |
| CACATG | 62         | 29                                    | 41                             |
| CACCTG | 20         | 15                                    | 41                             |
| CACGTG | 60         | 18                                    | 41                             |
| CACTTG | 58         | 30                                    | 41                             |
| CAGATG | 39         | 26                                    | 41                             |
| CAGCTG | 34         | 15                                    | 41                             |
| CAGGTG | 20         | 15                                    | 41                             |
| CAGTTG | 37         | 23                                    | 41                             |
| CATATG | 88         | 23                                    | 41                             |
| CATCTG | 39         | 26                                    | 41                             |
| CATGTG | 62         | 29                                    | 41                             |
| CATTTG | 92         | 35                                    | 41                             |

**Table S5B. Putative bHLH TFs binding sites in promoters of genes with reduced expression in *rsa1-1* without etress.**

| Motif  | Aboundance | Number of genes containing this motif | Total number of genes searched |
|--------|------------|---------------------------------------|--------------------------------|
| CAAATG | 139        | 51                                    | 54                             |
| CAACTG | 48         | 29                                    | 54                             |
| CAATTG | 90         | 28                                    | 54                             |
| CACATG | 84         | 40                                    | 54                             |
| CACCTG | 29         | 21                                    | 54                             |
| CACGTG | 36         | 16                                    | 54                             |
| CACTTG | 62         | 34                                    | 54                             |
| CAGATG | 62         | 34                                    | 54                             |
| CAGCTG | 50         | 21                                    | 54                             |
| CAGGTG | 29         | 21                                    | 54                             |
| CAGTTG | 48         | 29                                    | 54                             |
| CAGTTG | 48         | 29                                    | 54                             |
| CATATG | 122        | 36                                    | 54                             |
| CATCTG | 62         | 34                                    | 54                             |
| CATGTG | 84         | 40                                    | 54                             |
| CATTTG | 139        | 51                                    | 54                             |

**Table S5C. Putative bHLH TFs binding sites in promoters of genes with increased expression in *rsal-1* under salt stress.**

| Motif  | Abundance | Number of genes containing this motif | Total number of genes searched |
|--------|-----------|---------------------------------------|--------------------------------|
| CAAATG | 180       | 66                                    | 69                             |
| CAACTG | 65        | 45                                    | 69                             |
| CAAGTG | 113       | 55                                    | 69                             |
| CAATTG | 112       | 39                                    | 69                             |
| CACATG | 126       | 56                                    | 69                             |
| CACCTG | 39        | 26                                    | 69                             |
| CACGTG | 138       | 40                                    | 69                             |
| CACTTG | 113       | 55                                    | 69                             |
| CAGATG | 78        | 46                                    | 69                             |
| CAGCTG | 64        | 24                                    | 69                             |
| CAGGTG | 39        | 26                                    | 69                             |
| CAGTTG | 65        | 45                                    | 69                             |
| CATATG | 138       | 41                                    | 69                             |
| CATCTG | 78        | 46                                    | 69                             |
| CATGTG | 126       | 56                                    | 69                             |
| CATTTG | 180       | 66                                    | 69                             |

**Table S5D. Putative bHLH TFs binding sites in promoters of genes with reduced expression in *rsal-1* under salt stress.**

| Motif  | Abundance | Number of genes containing this motif | Total number of genes searched |
|--------|-----------|---------------------------------------|--------------------------------|
| CAAATG | 191       | 73                                    | 76                             |
| CAACTG | 74        | 47                                    | 76                             |
| CAAGTG | 94        | 47                                    | 76                             |
| CAATTG | 162       | 63                                    | 76                             |
| CACATG | 155       | 63                                    | 76                             |
| CACCTG | 35        | 25                                    | 76                             |
| CACGTG | 56        | 24                                    | 76                             |
| CACTTG | 94        | 47                                    | 76                             |
| CAGATG | 85        | 45                                    | 76                             |
| CAGCTG | 56        | 24                                    | 76                             |
| CAGGTG | 35        | 25                                    | 76                             |
| CAGTTG | 74        | 47                                    | 76                             |
| CATATG | 156       | 54                                    | 76                             |
| CATCTG | 85        | 45                                    | 76                             |
| CATGTG | 155       | 63                                    | 76                             |
| CATTTG | 191       | 73                                    | 76                             |
