# Supplementary material for: A Nuclear Calcium-Sensing Pathway Is Critical for Gene Regulation and Salt Stress Tolerance in Arabidopsis
Source: PubMed Central journal article supplement (PMC3757082; doi:10.1371/journal.pgen.1003755), 2013-08-29
Supplement: pgen.1003755.s017.pdf [file pgen.1003755.s017.pdf]

**Table S6.** Primers Used in This Study.**Table S6A.** Primers Used for ChIP-qPCR in This Study.

| Name                | Sequence (5' to 3')               | Position (relative to translation start site) | <i>cis</i> element (for bHLH TF)         | Purpose                         |
|---------------------|-----------------------------------|-----------------------------------------------|------------------------------------------|---------------------------------|
| SOS1 ChIP A 5'      | CATTAGGATCGACGGTTGGTCGA           | -984 to -882                                  | CACTTG                                   | ChIP-qPCR                       |
| SOS1 ChIP A 3'      | TCATTTTCATGCTACCCAGAAGCACCT       |                                               |                                          |                                 |
| SOS1 ChIP B 5'      | ATGTATTTTTGGTAGGCTAGTCGTCT        | -643 to -497                                  | CATTG, CAATTG                            | ChIP-qPCR                       |
| SOS1 ChIP B 3'      | TCGTAGTTGGTTTTTTGACATTTTGGGAC     |                                               |                                          |                                 |
| SOS1 ChIP C 5'      | CATTGAAGAATTGGTCGGCTGAAAATTGTG    | -235 to -31                                   | CACGTG                                   | ChIP-qPCR                       |
| SOS1 ChIP C 3'      | CAGAGGAAGAAGAAGAATGCTCGTTCACTGA   |                                               |                                          |                                 |
| SOS1 ChIP D 5'      | ACGACTGTAATCGACGCGACG             | +4 to +128                                    | not applicable                           | ChIP-qPCR<br>(negative control) |
| SOS1 ChIP D 3'      | AGAGACATTCGACGAAGAGAACG           |                                               |                                          |                                 |
| At2g36690 ChIP A 5' | TGCGATAGAGTATGGAAGTACTGGCAATAG    | -1356 to -1158                                | CAGTTG                                   | ChIP-qPCR                       |
| At2g36690 ChIP A 3' | CGTCGCATATTATTGGGACGAGAATACCAG    |                                               |                                          |                                 |
| At2g36690 ChIP B 5' | CTTACCTTTTCGAACGAATCTAAAACGTGTCC  | -923 to -730                                  | CAAATG                                   | ChIP-qPCR                       |
| At2g36690 ChIP B 3' | TGGGTTTAGAGAGTATTTTTTCTCCCGA      |                                               |                                          |                                 |
| At2g36690 ChIP C 5' | GAAGGAGACGTGAGCAAGAATATGATAGACG   | +609 to +737                                  | not applicable                           | ChIP-qPCR<br>(negative control) |
| At2g36690 ChIP C 3' | CTGGTTGAAACTCGTGCCGTATCGTACTG     |                                               |                                          |                                 |
| Atg514130 ChIP A 5' | GCTCCGGCACTGAGCAGAGCAGAAG         | -1469 to -1356                                | CAACTG                                   | ChIP-qPCR                       |
| Atg514130 ChIP A 3' | AGGATCCAGTTAATAAACCGGAGCGGAG      |                                               |                                          |                                 |
| Atg514130 ChIP B 5' | TCCTTTCCAACATGTTTCGAACCTAGC       | -1196 to -985                                 | CACTTG, CAGTTG                           | ChIP-qPCR                       |
| Atg514130 ChIP B 3' | TCCATATTACATGATCAACATTCTAGCTATCTG |                                               |                                          |                                 |
| Atg514130 ChIP C 5' | GTATTCCGCTGAATTCATGGCGATCAGTC     | - 525 to -214                                 | CAGATG                                   | ChIP-qPCR                       |
| Atg514130 ChIP C 3' | TCTAATCACATTCACAGGTGAATGCCAG      |                                               |                                          |                                 |
| Atg514130 ChIP D 5' | TCGATCACGATGGATATTCGTAGTGATG      | +31 to +127                                   | not applicable                           | ChIP-qPCR<br>(negative control) |
| Atg514130 ChIP D 3' | CATTTGACTCGGCCACCATGGAAAAC        |                                               |                                          |                                 |
| At2g39040 ChIP A 5' | GTGGGCCTTTACCTTGTTGACTTAG         | -833 to -588                                  | CATATG (2 copies at two different sites) | ChIP-qPCR                       |
| At2g39040 ChIP A 3' | TCCATATGCAATGGGAATTTTGGGA         |                                               |                                          |                                 |
| At2g39040 ChIP B 5' | ACAGGGAACCTTGCTTGCCACCCAGAC       | -143 to +6                                    | CAATTG, CAAGTG                           | ChIP-qPCR                       |
| At2g39040 ChIP B 3' | AGCCATGTGATCGACTTTAGATTTG         |                                               |                                          |                                 |
| At2g39040 ChIP C 5' | AGGAAGATGGGAAGGTAAGCTGAAGATG      | +171 to +269                                  | not applicable                           | ChIP-qPCR<br>(negative control) |
| At2g39040 ChIP C 3' | GCTTCGACTTTCTTCCACACTATCTGC       |                                               |                                          |                                 |

**Table S6B.** Remaining Primers Used in This Study.

| Name                | Sequence (5' to 3')                                              | Purpose                      |
|---------------------|------------------------------------------------------------------|------------------------------|
| RSA1 164 F          | CACCTCCCCGGGTGCAGTTGAGAAAAATGTAAATA                              | pRSA1:GUS                    |
| RSA1 164 R          | CGGGGTACCCTGGTTTCAATTTTGTAAATTTAG                                |                              |
| RSA1 104 F          | CACCATGCATAGAGATATGTATTCTTCAAGAGG                                | p35S:YFP-RSA1                |
| RSA1 104 R          | CTATAGAGACAATCTAACAAGTTTATTGTA                                   |                              |
| RSA1 99 F           | CACCTCCCCGGGTGCAGTTGAGAAAAATGTAAATA                              | pRSA1:RSA1 in pMDC99         |
| RSA1 99 R           | CGAGCTCCTATAGAGACAATCTAACAAGTTTA                                 |                              |
| RSA1 3507 attB1 F3  | GGGGACAAGTTTGTACAAAAAAGCAGGCTCCCTGA<br>GGAGGATCCTGAAGAAGACCCTGA  | pDEST17-RSA1                 |
| RSA1 CDS attB2 R    | GGGGACCACTTTGTACAAGAAAGCTGGG<br>TCCTATAGAGACAATCTAACAAGT         |                              |
| RSA1genomic attB1 F | GGGGACAAGTTTGTACAAAAAAGCAGGCTTCTGCA<br>GTTGAGAAAAAATGTAAATAAGTTG | pRSA1:RSA1-GFP in<br>pMDC107 |
| RSA1genomic attB2 R | GGGGACCACTTTGTACAAGAAAGCTGGGTCTAGAG<br>ACAATCTAACAAGTTTATTG      |                              |
| RSA1 attB1 F        | GGGGACAAGTTTGTACAAAAAAGCAGGCTTCATGC<br>ATAGAGATATGTATTCTTC       | pDEST32-RSA1                 |
| RSA1 attB2 R        | GGGGACCACTTTGTACAAGAAAGCTGGGTCTCA<br>TAGAGACAATCTAACAAGT         |                              |
| RITF1 attB1 F       | GGGGACAAGTTTGTACAAAAAAGCAGGCTTCAT<br>GGCGTCTCTGATCTCAG           | pDEST22-RITF1                |
| RITF1 attB2 R       | GGGGACCACTTTGTACAAGAAAGCTGGGTCTCAA<br>ATCGGTGGAGGAGCTG           |                              |
| RITF1 attB1 F       | GGGGACAAGTTTGTACAAAAAAGCAGGCTTCAT<br>GGCGTCTCTGATCTCAG           | p35S:RITF1-GFP               |
| RITF1 GFP R         | GGGGACCACTTTGTACAAGAAAGCTGGGTC<br>AATCGGTGGAGGAGCTGAG            |                              |
| RSA1 Xba I F        | AGTCTCTAGAATGCATAGAGATATGTATTCTTCAAGAGG                          | pUC-SPYNE-RSA1               |
| RSA1 Sal I R        | ACTGGTTCGACTAGAGACAATCTAACAAGTTTAT<br>TGTATAAAATTCG              |                              |
| RITF1 BamH I F      | ACTGGGATCCATGGCGTCTCTGATCTCAGATATTG                              | pUC-SPYCE-RITF1              |
| RITF1 Sal I R       | ACTGGTGCACAATCGGTGGAGGAGCTGAG                                    |                              |
| At317100 AttB1 F    | GGGGACAAGTTTGTACAAAAAAGCAGGCTTCATGGA<br>GTCTATATCTCCGGTATCGAATC  | pDEST22-At3g17100            |
| At3g17100 AttB2 R   | GGGGACCACTTTGTACAAGAAAGCTGGGTCTTAACCA<br>AGCATGTGTGTTTGTC        |                              |
| At1g09250 AttB1 F   | GGGGACAAGTTTGTACAAAAAAGCAGGCTTCATGGTGGA<br>GTCTCTGTTCCCGAGCATC   | pDEST22-At1g09250            |
| At1g09250 AttB2 R   | GGGGACCACTTTGTACAAGAAAGCTGGGTCTTAAGTT<br>CCGGTCAACGTCGTCCTG      |                              |

|                      |                                                                                                     |                                                                                                                                                                                                                                              |
|----------------------|-----------------------------------------------------------------------------------------------------|----------------------------------------------------------------------------------------------------------------------------------------------------------------------------------------------------------------------------------------------|
| At3g05800 AttB1 F    | GGGGACAAGTTTGTACAAAAAAGCAGGCTTCATGTCTT<br>CTGAACAAGGAAATGGATC                                       | pDEST22-At3g05800                                                                                                                                                                                                                            |
| At3g05800 AttB2 R    | GGGGACCACTTTGTACAAGAAAGCTGGGTCTATAAA<br>GCCGAGCCGAGATTAGTAGAC                                       |                                                                                                                                                                                                                                              |
| RSA1 3507 attB1 F3   | GGGGACAAGTTTGTACAAAAAAGCAGGCTTCCCTGAGGAGGATCCTGAA<br>GAAGACCCTGA                                    | Three-step overlapping PCR amplifications of RSA1 fragment without EF-hand motif in pDEST17: step 1 using F3 and R1; step 2 using F3 and R2 (product from step 1 as a template); step 3 using F3 and R3 (product from step 2 as a template). |
| RSA1 w/o EF motif R1 | GGGGACCACTTTGTACAAGAAAGCTGGGTCCA<br>CGGTGAGATAGAAACTTTCCAAGCTGTGAATGGTTACTCTCATAAAAA<br>TCTGAAAG    |                                                                                                                                                                                                                                              |
| RSA1 w/o EF motif R2 | GGGGACCACTTTGTACAAGAAAGCTGGGTCCAGTGT<br>TGCTCTCTAACAAAGCGCTCTGCACAAGTTCCCTTGACTTCACGGTGAGATA<br>GAA |                                                                                                                                                                                                                                              |
| RSA1 w/o EF motif R3 | GGGGACCACTTTGTACAAGAAAGCTGGGTCTTA<br>AGACAATCTAACAAAGTTTATTGTATAAAATTCGATCATCTCTTCCAGTGT<br>GCTCTC  |                                                                                                                                                                                                                                              |
| RSA1 attB1 F         | GGGGACAAGTTTGTACAAAAAAGCAGGCTTCATGC<br>ATAGAGATATGTATTCTTC                                          | p35S:YFP-RSA1(-EF).<br>Three-step overlapping PCR amplifications: step 1 using F and R1; step 2 using F and R2 (product from step 1 as a template); step 3 using F and R3 (product from step 2 as a template).                               |
| RSA1 w/o EF motif R1 | GGGGACCACTTTGTACAAGAAAGCTGGGTCCA<br>CGGTGAGATAGAAACTTTCCAAGCTGTGAATGGTTACTCTCATAAAAA<br>TCTGAAAG    |                                                                                                                                                                                                                                              |
| RSA1 w/o EF motif R2 | GGGGACCACTTTGTACAAGAAAGCTGGGTCCAGTGT<br>TGCTCTCTAACAAAGCGCTCTGCACAAGTTCCCTTGACTTCACGGTGAGATA<br>GAA |                                                                                                                                                                                                                                              |
| RSA1 w/o EF motif R3 | GGGGACCACTTTGTACAAGAAAGCTGGGTCTTA<br>AGACAATCTAACAAAGTTTATTGTATAAAATTCGATCATCTCTTCCAGTGT<br>GCTCTC  |                                                                                                                                                                                                                                              |
| RSA1 attB1 F         | GGGGACAAGTTTGTACAAAAAAGCAGGCTTCATGC<br>ATAGAGATATGTATTCTTC                                          | RSA1-nLUC for<br>Split-LUC assay                                                                                                                                                                                                             |
| RSA1 genomic attB2 R | GGGGACCACTTTGTACAAGAAAGCTGGGTCTAGAG<br>ACAATCTAACAAAGTTTATTG                                        |                                                                                                                                                                                                                                              |
| RITF1 attB1 F        | GGGGACAAGTTTGTACAAAAAAGCAGGCTTCAT<br>GGGTCTCTGATCTCAG                                               | RITF1-cLUC for<br>Split-Luc assay                                                                                                                                                                                                            |
| RITF1 GFP R          | GGGGACCACTTTGTACAAGAAAGCTGGGTCT<br>AATCGGTGGAGGAGCTGAG                                              |                                                                                                                                                                                                                                              |
| SOS1 pro kpnI F      | AGTCGGTACCCGTAAGAACTTGTGAATGGCAGAGGCAAGTG                                                           | SOS1:LUC for dual<br>luciferase reporter assay                                                                                                                                                                                               |
| SOS1 pro speI R      | AGTCACTAGTGAAGCAACAACACAGAGGAAGAAGAAGAAATGCTCG                                                      |                                                                                                                                                                                                                                              |
| RITF1 CDS speI F     | AGTCACTAGTATGGCGTCTCTGATCTCAG                                                                       | RITF1 for dual<br>luciferase reporter assay                                                                                                                                                                                                  |
| RITF1 CDS kpnI F     | AGTCGGTACCTCAAATCGGTGGAGGAGCTG                                                                      |                                                                                                                                                                                                                                              |
| RSA1CDS xbaI F       | AGTCTCTAGAATGCATAGAGATATGTATTCTTCAAGAGGCACTGG                                                       | RSA1 for dual<br>luciferase reporter assay                                                                                                                                                                                                   |
| RSA1CDS kpnI F       | AGTCGGTACCCTATAGAGACAATCTAACAAAGTTTATTG                                                             |                                                                                                                                                                                                                                              |
| RSA1CDS xbaI F       | AGTCTCTAGAATGCATAGAGATATGTATTCTTCAAGAGGCACTGG                                                       | RSA1(-EF) for dual<br>luciferase reporter assay                                                                                                                                                                                              |
| RSA1CDS kpnI F       | AGTCGGTACCCTATAGAGACAATCTAACAAAGTTTATTG                                                             |                                                                                                                                                                                                                                              |
| SOS1 attB1 F         | GGGGACAAGTTTGTACAAAAAAGCAGGCTTCATGACGACTGTAATCGACG<br>CGACGATGG                                     | p35S:HA-SOS1                                                                                                                                                                                                                                 |

|                      |                                                                 |              |
|----------------------|-----------------------------------------------------------------|--------------|
| SOS1 attB2 R         | GGGGACCACTTTGTACAAGAAAGCTGGGTCTCATAGATCGTTCCTGAAAA<br>CGATTTTAC | p35S:HA-SOS1 |
| At3G06590 qPCR F     | CTCTGCTTCATCCGCCGCATCGTCTC                                      | qRT-PCR      |
| At3G06590 qPCR R     | GAGCTCGATCGGCGGCTTCACGGACG                                      |              |
| At2g39040 qPCR F     | AGCTGCCCTGGAGCCGAGGATATC                                        | qRT-PCR      |
| At2g39040 qPCR R     | TGATTTCAAACCCGAAAGCGAG                                          |              |
| RSA1 qPCR F          | GAAGTTCAGTGAGTGGTGGCGCAGAAGGAG                                  | qRT-PCR      |
| RSA1 qPCR R          | GGTGAATCAGGTAAGTAGGGACATATC                                     |              |
| At2G36690 qPCR F     | CAAGTATATATGGCCTGAACCTGACCGA                                    | qRT-PCR      |
| At2G36690 qPCR R     | CATGATTCACAACCTGAAAGAAGCCGTAG                                   |              |
| <i>rsa1-3</i> qPCR F | CAGATTTTTTGACCGTAACCAGGCA                                       | qRT-PCR      |
| <i>rsa1-3</i> qPCR R | CTAACAAAGCGCTCTGCACAAGT                                         |              |
| <i>rsa1-2</i> qPCR F | AAGGACACAAAGGAGCGGACT                                           | qRT-PCR      |
| <i>rsa1-2</i> qPCR R | ATGTCAACCAATCGCGAAGA                                            |              |
| SOS1 qPCR F          | GACGCCGTTCTCTCGTCCGGAATGTCTC                                    | qRT-PCR      |
| SOS1 qPCR R          | GAGAGATCCAAGAGCAATCCGATAACG                                     |              |
| At5g14130 qPCR F     | TGGTGCCGAGTCAAATGCTC                                            | qRT-PCR      |
| At5g14130 qPCR R     | TGTCATCTGCGTCTTTCTCTGCGTC                                       |              |
| At1g10480 qPCR F     | AGTCGTACGCCGAAATCACG                                            | qRT-PCR      |
| At1g10480 qPCR R     | TGCATGGAGGAGAATGCACAATACG                                       |              |
| At5g67400 qPCR F     | TGACACAACCACTGCTCAACTC                                          | qRT-PCR      |
| At5g67400 qPCR R     | ACGTCAAATCCATCTCCGGCCAAAG                                       |              |
| At3g56980 qPCR F     | TCCAAACTTTGGGTGGCCATCAAC                                        | qRT-PCR      |
| At3g56980 qPCR R     | AGCATTGTGATTAAGTCTCTGACGACC                                     |              |
| At3g17100 qPCR F     | GAGCTCTAATTCCGATCGCTCTCGTC                                      | qRT-PCR      |
| At3g17100 qPCR R     | CTTCACGTACGGCTCTACCTCCACGTGG                                    |              |
| At1g09250 qPCR F     | GAGATAGAGGCACGACGTGTCAACGAAG                                    | qRT-PCR      |
| At1g09250 qPCR R     | CACCGAGTCGTACCACGAGCGGACG                                       |              |
| At3g05800 qPCR F     | GTTACCGGAGCTTTTGGACGAGACAG                                      | qRT-PCR      |
| At3g05800 qPCR R     | CATAGTATTTTCGTCCAACCTCGTGA                                      |              |
| TUB 8 F              | ATAACCGTTTCAAATTCTCTCTCTC                                       | qRT-PCR      |
| TUB 8 R              | TGCAAATCGTTCTCTCCTTG                                            |              |
| CS16026-LP           | CTGAAGCCGAAACTGATAATAGA                                         | Genotyping   |
| CS16026-RP           | GAAACTCGCAAGATTACTGGTTA                                         |              |
| CS811403 LP          | GCATTACAAATGCCACTTTTCG                                          | Genotyping   |
| CS811403 RP          | TTAACCTCATCAAATCGGTGG                                           |              |
| SALK_007142 LP       | AGAAGCGATGCTTGATCAATGCGATC                                      | Genotyping   |
| SALK_007142 RP       | AGTCTCTTCTCTTCTCTCAACACG                                        |              |
| GK233G09 LP          | GGTTAGTCGATTCGGAACGAGTC                                         | Genotyping   |
| GK233G09 RP          | ACTGGTGGAACTTAGATTCTTG                                          |              |
| GK428G06 LP          | CCACATGAATTCTACCTCAACC                                          | Genotyping   |
| GK428G06 RP          | ACTCGCTAAAATCGCTCTGCTC                                          |              |
| SALK_022587 LP       | CAGAGAAAACGCATAACCCAG                                           | Genotyping   |
| SALK_022587 RP       | TTTCTCCAACGATATTGACGG                                           |              |
